# Supplementary material for: Electroantennogram and Olfactory behavioral responses of Trabala vishnou gigantina (Lepidoptera: Lasiocampidae) to herbivore induced Hippophae rhamnoides leaf volatiles
Source: PeerJ. 2025 Oct 1;13:e20124. doi: 10.7717/peerj.20124 (PMC12495948; doi:10.7717/peerj.20124)
Supplement: Supplemental Information 1 [file peerj-13-20124-s001.xlsx]

## Sheet: Volatile species and components
	Compounds	Aristolochene	2-Heptanol	Acetic acid, non-3-enyl ester, cis-	cis-5-Octen-1-ol	10,10-Dimethyl-2,6-dimethylenebicyclo[7.2.0]undecane	1H-Pyrrole-2-carboxaldehyde	1-Tridecene	1-Octanol	1-Octen-3-ol	1-Cyclohexene-1-acetaldehyde, 2,6,6-trimethyl-	Hexyl 2-methyl butyrate	2-Hexanone, 3-methyl-	(±)-Dihydroactinidiolide	Sabinyl acetate	5-Nonanone	(-)-α-cedrene	β-sesquiphellandrene	Benzeneethanol, .beta.-methyl-	γ-cadinene	Benzeneacetic acid, ethyl ester	Butanoic acid, butyl ester	Linalool	Humulene	Nonane	10-Undecenal	p-cymene	cis-3-Hexenyl acetate	Octanal	Cedrene	cis-3-Hexenyl pyruvate	Longifolene	Perillyl alcohol	2-Ethyl-1-hexanol
Sample1	ck-21	-	1.30616	0.729832	2.64104	2.52197	2.3713	1.65318	15.2576	1.35028	0.65138	-	16.1369	11.4705	0.691596	4.82157	0.209448	2.60219	15.1582	0.278913	3.57862	5.89237	0.829202	-	4.45649	2.87981	0.446195	2.72337	1.80853	0.780537	5.27577	0.0293121	0.737105	1.96152
Sample2	ck-24	-	0.747389	1.01862	3.4096	3.50185	2.66111	1.88993	21.3736	1.55069	0.648905	-	20.9986	14.5814	1.28838	6.05477	0.268439	3.70604	15.9445	1.53473	3.50569	12.9259	0.866129	-	4.18086	4.18279	0.4445	4.01637	2.20909	1.10963	10.8668	0.264954	0.575365	1.95407
Sample3	ck-3	-	1.24988	0.821654	0.567333	3.29054	2.88996	1.81505	19.8726	1.47899	0.709166	-	15.1083	17.2937	1.07273	5.57242	0.221207	3.54825	15.0364	0.748723	4.00859	16.2725	1.08317	-	4.3454	3.63847	0.485779	3.50208	2.45497	1.15579	14.1977	0.407832	0.867991	2.13553
Sample4	ck-6	-	1.55176	0.152507	0.55457	3.30769	1.6331	1.42958	9.13771	1.49115	0.693212	-	16.4758	3.38053	0.121312	6.11992	0.30396	1.87213	14.1597	0.607687	4.99567	34.9411	1.23972	-	4.46507	1.17013	3.45026	2.10657	1.39953	1.40988	38.22	0.226564	0.112647	2.08749
Average		-	1.2138	0.680653	1.79314	3.15551	2.38887	1.69693	16.4104	1.46778	0.675666	-	17.1799	11.6815	0.793503	5.64217	0.250763	2.93215	15.0747	0.792514	4.02214	17.508	1.00456	-	4.36196	2.9678	1.20668	3.0871	1.96803	1.11396	17.14	0.232166	0.573277	2.03465
SE			0.16872	0.18607	0.7285	0.21655	0.27336	0.10189	2.75138	0.04218	0.0151		1.30567	3.01188	0.25578	0.29955	0.02184	0.42924	0.3654	0.26626	0.34295	6.20052	0.09635		0.06623	0.65608	0.74792	0.42126	0.23163	0.12926	7.2637	0.07806	0.16479	0.04547
Sample5	R-21	2.08811	0.153866	0.730265	4.09665	8.76564	0.217419	1.66634	5.20553	1.36332	9.08949	0.771478	0.418113	3.63904	0.909644	14.9349	2.5907	1.48291	19.3275	3.96067	3.88191	83.6873	1.69438	4.59764	1.65234	2.90511	4.83896	36.2168	0.334491	5.14573	90.4887	2.56857	0.561596	29.3366
Sample6	R-24	1.56582	0.109243	1.09631	2.79234	3.90199	0.154365	2.60833	5.0774	0.182863	6.56789	0.471558	0.296856	2.80998	1.19983	0.641208	2.18983	2.14047	15.8321	2.82185	3.25263	83.6415	1.19638	1.74282	0.237485	4.72207	6.65272	31.7808	0.237485	2.09556	76.0553	1.56353	0.698428	14.9494
Sample7	R-3	1.03751	0.820141	2.90892	4.14883	3.40307	0.210477	6.05859	25.5079	1.24351	3.14963	0.688337	25.4891	3.20516	3.11496	5.40862	1.93342	2.7224	18.5168	2.43678	5.17865	45.5906	0.92554	1.1312	4.15325	15.3082	2.23104	35.7483	2.47844	1.17276	52.9498	1.3351	1.92858	26.9892
Sample8	R-6	2.99649	0.151499	4.66358	5.39441	48.4508	0.214075	7.99874	6.25619	1.46461	5.01512	0.369434	24.6184	0.42815	4.88373	0.889234	2.72705	3.54966	17.1825	11.7172	4.8252	26.278	3.03125	2.21304	0.329346	20.8084	0.451204	36.6009	0.329346	24.6131	30.1921	4.17516	3.29077	16.805
Average		1.92198	0.308687	2.34977	4.10806	16.1304	0.199084	4.583	10.5118	1.06357	5.95553	0.575202	12.7056	2.52058	2.52704	5.46849	2.36025	2.47386	17.7147	5.23411	4.2846	59.7994	1.71189	2.42117	1.59311	10.9359	3.54348	35.0867	0.84494	8.25678	62.4215	2.41059	1.61984	22.0201
SE		0.41746	0.17079	0.90647	0.53132	10.8411	0.01497	1.47904	5.00569	0.29703	1.25679	0.09328	7.13145	0.71773	0.92543	3.34027	0.18232	0.43896	0.76768	2.18509	0.613	14.3314	0.46772	0.75854	0.91253	4.27871	1.37327	1.11566	0.54496	5.51778	13.2354	0.64632	0.63615	3.59878
		1	2	3	4	5	6	7	8	9	10	11	12	13	14	15	16	17	18	19	20	21	22	23	24	25	26	27	28	29	30	31	32	33

## Sheet: Behavioral responses
			Odor arm	Control arm	No response
	2-ethylhexyl acetate	Female	33	6	1
		Male	30	7	2
	2-ethylhexanol	Female	29	7	2
		Male	18	17	5
	Humulene	Female	17	18	4
		Male	18	15	5
	Leaf acetate	Female	16	19	2
		Male	18	18	3
	butyl butyrate	Female	16	18	2
		Male	15	19	2
	Longifolene	Female	32	7	1
		Male	26	8	4

## Sheet: 2-ethylhexanol
male																	female
Standard	StimID	Stim. Description	Recording	Surface[v*s]	Maximum[v]	th1[s]	tm[s]	th2[s]	Slope1[v/s]	Slope2[v/s]							Standard	StimID	Stim. Description	Recording	Surface[v*s]	Maximum[v]	th1[s]	tm[s]	th2[s]	Slope1[v/s]	Slope2[v/s]
Blank control	0	1	Rec - 1	-1.6e-05	-0.000468	0.32	0.52	0.82	-0.002	0.001							Blank control	0	1	Rec - 1	-2.8e-05	-0.000345	0.31	0.64	0.95	-0.001	0.001
10﹣5	0	2	Rec - 2	-2.1e-05	-0.000723	0.5	0.63	0.83	-0.002	0.001							10﹣5	0	2	Rec - 2	-3.2e-05	-0.000785	0.34	0.62	1.08	-0.002	0.001
10﹣4	0	3	Rec - 3	-4.3e-05	-0.000785	0.48	0.65	1.18	-0.004	0.001							10﹣4	0	3	Rec - 3	-0.00038	-0.000832	0.41	0.71	1.28	-0.006	0.001
10﹣3	0	4	Rec - 4	-0.000232	-0.000825	0.47	0.71	1.48	-0.006	0.001							10﹣3	0	4	Rec - 4	-0.000102	-0.00156	0.42	0.82	1.57	-0.009	0.001
10﹣2	0	5	Rec - 5	-3.4e-05	-0.001423	0.51	0.62	1.93	-0.012	0.001							10﹣2	0	5	Rec - 5	-0.000132	-0.001843	0.35	0.72	2.33	-0.015	0.001
10﹣1	0	6	Rec - 6	-0.000412	-0.00212	0.45	0.55	2.38	-0.015	0.001							10﹣1	0	6	Rec - 6	-0.000258	-0.002153	0.32	0.59	3.18	-0.016	0.001
Blank control	0	7	Rec - 7	-1.9e-05	-0.00048	0.38	0.54	0.85	-0.002	0.001							Blank control	0	7	Rec - 7	-2.3e-05	-0.000358	0.34	0.65	0.98	-0.002	0.001
Standard	StimID	Stim. Description	Recording	Surface[v*s]	Maximum[v]	th1[s]	tm[s]	th2[s]	Slope1[v/s]	Slope2[v/s]							Standard	StimID	Stim. Description	Recording	Surface[v*s]	Maximum[v]	th1[s]	tm[s]	th2[s]	Slope1[v/s]	Slope2[v/s]
Blank control	0	1	Rec - 1	-5.5e-05	-0.000512	0.42	0.65	0.78	-0.001	0.001							Blank control	0	1	Rec - 1	-3.3e-05	-0.000362	0.32	0.65	1.05	-0.002	0.001
10﹣5	0	2	Rec - 2	-6.2e-05	-0.000546	0.45	0.72	0.91	-0.002	0.001							10﹣5	0	2	Rec - 2	-3.8e-05	-0.000432	0.34	0.71	1.18	-0.003	0.001
10﹣4	0	3	Rec - 3	-7.4e-05	-0.000623	0.37	0.65	1.37	-0.003	0.002							10﹣4	0	3	Rec - 3	-7.6e-05	-0.000548	0.42	0.75	1.35	-0.004	0.001
10﹣3	0	4	Rec - 4	-8.1e-05	-0.000752	0.35	0.55	1.65	-0.006	0.001							10﹣3	0	4	Rec - 4	-8.6e-05	-0.001021	0.39	0.82	1.65	-0.006	0.001
10﹣2	0	5	Rec - 5	-0.000148	-0.00215	0.41	0.48	2.12	-0.008	0.001							10﹣2	0	5	Rec - 5	-0.000156	-0.001245	0.38	0.78	2.45	-0.012	0.002
10﹣1	0	6	Rec - 6	-0.000156	-0.002143	0.38	0.54	2.56	-0.007	0.002							10﹣1	0	6	Rec - 6	-0.000231	-0.001645	0.35	0.75	3.28	-0.015	0.001
Blank control	0	7	Rec - 7	-4.5e-05	-0.000472	0.45	0.71	0.85	-0.001	0.001							Blank control	0	7	Rec - 7	-3.4e-05	-0.000482	0.31	0.72	1.08	-0.003	0.001
Standard	StimID	Stim. Description	Recording	Surface[v*s]	Maximum[v]	th1[s]	tm[s]	th2[s]	Slope1[v/s]	Slope2[v/s]							Standard	StimID	Stim. Description	Recording	Surface[v*s]	Maximum[v]	th1[s]	tm[s]	th2[s]	Slope1[v/s]	Slope2[v/s]
Blank control	0	1	Rec - 1	-0.000165	-0.000385	0.42	0.65	0.82	-0.002	0.001							Blank control	0	1	Rec - 1	-3.5e-05	-0.000552	0.33	0.72	0.88	-0.001	0.001
10﹣5	0	2	Rec - 2	-0.000184	-0.000546	0.39	0.67	0.88	-0.001	0.001							10﹣5	0	2	Rec - 2	-7.6e-05	-0.000586	0.42	0.75	1.07	-0.002	0.001
10﹣4	0	3	Rec - 3	-0.000136	-0.000558	0.34	0.71	1.22	-0.002	0.001							10﹣4	0	3	Rec - 3	-8.5e-05	-0.000625	0.43	0.82	1.41	-0.004	0.001
10﹣3	0	4	Rec - 4	-0.000258	-0.000642	0.33	0.71	1.48	-0.005	0.001							10﹣3	0	4	Rec - 4	-0.000135	-0.000856	0.35	0.69	1.74	-0.008	0.001
10﹣2	0	5	Rec - 5	-0.000238	-0.001125	0.31	0.62	1.95	-0.007	0.001							10﹣2	0	5	Rec - 5	-0.000187	-0.001584	0.37	0.65	2.36	-0.015	0.001
10﹣1	0	6	Rec - 6	-0.000243	-0.001436	0.37	0.54	2.55	-0.008	0.002							10﹣1	0	6	Rec - 6	-0.000245	-0.001754	0.41	0.68	3.38	-0.016	0.001
Blank control	0	7	Rec - 7	-0.000152	-5.6e-05	0.38	0.55	0.79	-0.001	0.001							Blank control	0	7	Rec - 7	-4.5e-05	-0.000512	0.35	0.73	0.93	-0.002	0.001

## Sheet: 2-ethylhexyl acetate
male																	female
Standard	StimID	Stim. Description	Recording	Surface[v*s]	Maximum[v]	th1[s]	tm[s]	th2[s]	Slope1[v/s]	Slope2[v/s]							Standard	StimID	Stim. Description	Recording	Surface[v*s]	Maximum[v]	th1[s]	tm[s]	th2[s]	Slope1[v/s]	Slope2[v/s]
Blank control	0	1	Rec - 1	-1.8e-05	-0.000454	0.51	0.68	0.94	-0.002	0.001							Blank control	0	1	Rec - 1	-2.4e-05	-0.000568	0.45	0.75	0.95	-0.003	0.001
10﹣5	0	2	Rec - 2	-1.9e-05	-0.000681	0.36	0.84	1.18	-0.003	0.001							10﹣5	0	2	Rec - 2	-2.6e-05	-0.000852	0.38	0.68	1.28	-0.004	0.001
10﹣4	0	3	Rec - 3	-0.00024	-0.000805	0.41	0.67	1.52	-0.004	0.001							10﹣4	0	3	Rec - 3	-0.00034	-0.000821	0.43	0.65	1.75	-0.008	0.001
10﹣3	0	4	Rec - 4	-0.000249	-0.001209	0.37	0.7	1.92	-0.007	0.001							10﹣3	0	4	Rec - 4	-0.000145	-0.00145	0.35	0.73	2.48	-0.017	0.001
10﹣2	0	5	Rec - 5	-7.9e-05	-0.002139	0.35	0.59	2.84	-0.014	0.001							10﹣2	0	5	Rec - 5	-0.000123	-0.002437	0.34	0.69	3.25	-0.018	0.001
10﹣1	0	6	Rec - 6	-0.000605	-0.0023	0.33	0.58	3.22	-0.015	0.001							10﹣1	0	6	Rec - 6	-0.000325	-0.0025	0.31	0.68	3.45	-0.019	0.001
Blank control	0	7	Rec - 7	-9e-05	-0.00038	0.48	0.77	1	-0.002	0.001							Blank control	0	7	Rec - 7	-1.9e-05	-0.00048	0.44	0.76	0.98	-0.004	0.001
Standard	StimID	Stim. Description	Recording	Surface[v*s]	Maximum[v]	th1[s]	tm[s]	th2[s]	Slope1[v/s]	Slope2[v/s]							Standard	StimID	Stim. Description	Recording	Surface[v*s]	Maximum[v]	th1[s]	tm[s]	th2[s]	Slope1[v/s]	Slope2[v/s]
Blank control	0	1	Rec - 1	-0.000195	-0.000555	0.55	0.75	0.88	-0.002	0.001							Blank control	0	1	Rec - 1	-8.9e-05	-0.000653	0.44	0.72	0.86	-0.002	0.001
10﹣5	0	2	Rec - 2	-7.2e-05	-0.000679	0.42	0.88	1.38	-0.002	0.001							10﹣5	0	2	Rec - 2	-4.5e-05	-0.000586	0.37	0.75	1.33	-0.003	0.001
10﹣4	0	3	Rec - 3	-9.6e-05	-0.000708	0.44	0.71	1.52	-0.003	0.001							10﹣4	0	3	Rec - 3	-8.8e-05	-0.000712	0.34	0.85	1.74	-0.006	0.002
10﹣3	0	4	Rec - 4	-0.00084	-0.001207	0.34	0.56	1.98	-0.008	0.001							10﹣3	0	4	Rec - 4	-0.00086	-0.001452	0.44	0.92	2.5	-0.007	0.001
10﹣2	0	5	Rec - 5	-0.000257	-0.002035	0.34	0.56	2.84	-0.01	0.002							10﹣2	0	5	Rec - 5	-0.000243	-0.002214	0.34	0.95	3.44	-0.015	0.001
10﹣1	0	6	Rec - 6	-0.000181	-0.002053	0.34	0.52	3.17	-0.01	0.001							10﹣1	0	6	Rec - 6	-0.000281	-0.001865	0.44	0.85	3.49	-0.016	0.001
Blank control	0	7	Rec - 7	-2.2e-05	-0.000464	0.55	0.79	1.11	-0.002	0.001							Blank control	0	7	Rec - 7	-4.3e-05	-0.000582	0.51	0.74	1.28	-0.003	0.001
Standard	StimID	Stim. Description	Recording	Surface[v*s]	Maximum[v]	th1[s]	tm[s]	th2[s]	Slope1[v/s]	Slope2[v/s]							Standard	StimID	Stim. Description	Recording	Surface[v*s]	Maximum[v]	th1[s]	tm[s]	th2[s]	Slope1[v/s]	Slope2[v/s]
Blank control	0	1	Rec - 1	-0.000155	-0.000491	0.49	0.75	1.17	-0.002	0.001							Blank control	0	1	Rec - 1	-0.000122	-0.000543	0.43	0.78	1.08	-0.002	0.001
10﹣5	0	2	Rec - 2	-0.000193	-0.000614	0.47	0.72	1.24	-0.002	0.001							10﹣5	0	2	Rec - 2	-0.000185	-0.000623	0.44	0.69	1.34	-0.003	0.001
10﹣4	0	3	Rec - 3	-0.000143	-0.000612	0.42	0.7	1.58	-0.002	0.001							10﹣4	0	3	Rec - 3	-0.000152	-0.000642	0.35	0.72	1.74	-0.004	0.001
10﹣3	0	4	Rec - 4	-0.000376	-0.001098	0.37	0.66	1.95	-0.006	0.001							10﹣3	0	4	Rec - 4	-0.000289	-0.001223	0.33	0.58	2.55	-0.007	0.001
10﹣2	0	5	Rec - 5	-0.000188	-0.00178	0.35	0.59	2.86	-0.01	0.001							10﹣2	0	5	Rec - 5	-0.000176	-0.00162	0.35	0.63	3.46	-0.018	0.001
10﹣1	0	6	Rec - 6	-0.000245	-0.001806	0.35	0.56	3.26	-0.011	0.001							10﹣1	0	6	Rec - 6	-0.000253	-0.001658	0.35	0.65	3.51	-0.015	0.001
Blank control	0	7	Rec - 7	-0.0001	-0.000405	0.47	0.81	1.13	-0.001	0.001							Blank control	0	7	Rec - 7	-0.000145	-0.000485	0.38	0.75	1.03	-0.002	0.001

## Sheet: Humulene
male																	female
Standard	StimID	Stim. Description	Recording	Surface[v*s]	Maximum[v]	th1[s]	tm[s]	th2[s]	Slope1[v/s]	Slope2[v/s]							Standard	StimID	Stim. Description	Recording	Surface[v*s]	Maximum[v]	th1[s]	tm[s]	th2[s]	Slope1[v/s]	Slope2[v/s]
Blank control	0	1	Rec - 1	-1.8e-05	-0.000412	0.31	0.56	0.68	-0.001	0.001							Blank control	0	1	Rec - 1	-2.5e-05	-0.00034	0.32	0.67	0.95	-0.002	0.001
10﹣5	0	2	Rec - 2	-1.9e-05	-0.000658	0.45	0.61	0.89	-0.002	0.001							10﹣5	0	2	Rec - 2	-3e-05	-0.000776	0.31	0.68	1.071	-0.001	0.001
10﹣4	0	3	Rec - 3	-3.8e-05	-0.000697	0.52	0.64	1.29	-0.003	0.001							10﹣4	0	3	Rec - 3	-0.0004	-0.000838	0.44	0.79	1.415	-0.004	0.001
10﹣3	0	4	Rec - 4	-0.000152	-0.000749	0.48	0.65	1.63	-0.005	0.001							10﹣3	0	4	Rec - 4	-0.000122	-0.00151	0.48	0.72	1.882	-0.006	0.001
10﹣2	0	5	Rec - 5	-0.000256	-0.001245	0.53	0.71	1.91	-0.009	0.001							10﹣2	0	5	Rec - 5	-0.000128	-0.001809	0.37	0.78	2.451	-0.017	0.001
10﹣1	0	6	Rec - 6	-0.000368	-0.001568	0.47	0.62	1.92	-0.012	0.002							10﹣1	0	6	Rec - 6	-0.0003	-0.002113	0.39	0.7	2.545	-0.013	0.001
Blank control	0	7	Rec - 7	-1.7e-05	-0.000456	0.42	0.55	0.75	-0.001	0.001							Blank control	0	7	Rec - 7	-2.7e-05	-0.00035	0.35	0.6	0.98	-0.003	0.001
Standard	StimID	Stim. Description	Recording	Surface[v*s]	Maximum[v]	th1[s]	tm[s]	th2[s]	Slope1[v/s]	Slope2[v/s]							Standard	StimID	Stim. Description	Recording	Surface[v*s]	Maximum[v]	th1[s]	tm[s]	th2[s]	Slope1[v/s]	Slope2[v/s]
Blank control	0	1	Rec - 1	-5.6e-05	-0.000514	0.36	0.63	0.69	-0.001	0.001							Blank control	0	1	Rec - 1	-3.4e-05	-0.000379	0.31	0.63	1.35	-0.001	0.001
10﹣5	0	2	Rec - 2	-5.8e-05	-0.00054	0.5	0.69	0.93	-0.001	0.001							10﹣5	0	2	Rec - 2	-3.9e-05	-0.000444	0.34	0.73	1.36	-0.001	0.001
10﹣4	0	3	Rec - 3	-7.7e-05	-0.000626	0.35	0.68	1.405	-0.002	0.002							10﹣4	0	3	Rec - 3	-7e-05	-0.000521	0.4	0.78	1.451	-0.003	0.001
10﹣3	0	4	Rec - 4	-8.5e-05	-0.000755	0.4	0.59	1.855	-0.002	0.001							10﹣3	0	4	Rec - 4	-6e-06	-0.001033	0.34	0.86	1.83	-0.007	0.001
10﹣2	0	5	Rec - 5	-0.00015	-0.00217	0.46	0.45	2.155	-0.007	0.001							10﹣2	0	5	Rec - 5	-0.000166	-0.001266	0.44	0.71	2.59	-0.017	0.002
10﹣1	0	6	Rec - 6	-0.000163	-0.002445	0.4	0.6	2.205	-0.005	0.002							10﹣1	0	6	Rec - 6	-0.00026	-0.001687	0.47	0.79	2.725	-0.013	0.001
Blank control	0	7	Rec - 7	-4.8e-05	-0.00052	0.42	0.69	0.73	-0.001	0.001							Blank control	0	7	Rec - 7	-4.2e-05	-0.000476	0.38	0.78	1.15	-0.006	0.001
Standard	StimID	Stim. Description	Recording	Surface[v*s]	Maximum[v]	th1[s]	tm[s]	th2[s]	Slope1[v/s]	Slope2[v/s]							Standard	StimID	Stim. Description	Recording	Surface[v*s]	Maximum[v]	th1[s]	tm[s]	th2[s]	Slope1[v/s]	Slope2[v/s]
Blank control	0	1	Rec - 1	-0.00016	-0.000379	0.39	0.63	0.7	-0.001	0.001							Blank control	0	1	Rec - 1	-3.1e-05	-0.000551	0.34	0.71	0.91	-0.001	0.001
10﹣5	0	2	Rec - 2	-0.000178	-0.00055	0.4	0.64	0.875	-0.002	0.001							10﹣5	0	2	Rec - 2	-7.9e-05	-0.000696	0.4	0.74	1.07	-0.002	0.001
10﹣4	0	3	Rec - 3	-0.000146	-0.00055	0.42	0.77	1.395	-0.008	0.001							10﹣4	0	3	Rec - 3	-8.8e-05	-0.000626	0.42	0.81	1.51	-0.004	0.001
10﹣3	0	4	Rec - 4	-0.000266	-0.000667	0.45	0.75	1.815	-0.007	0.001							10﹣3	0	4	Rec - 4	-0.000123	-0.000878	0.35	0.68	1.87	-0.008	0.001
10﹣2	0	5	Rec - 5	-0.000245	-0.0011	0.31	0.65	1.915	-0.003	0.001							10﹣2	0	5	Rec - 5	-0.000177	-0.001591	0.37	0.63	2.59	-0.015	0.001
10﹣1	0	6	Rec - 6	-0.000234	-0.001466	0.37	0.6	1.975	-0.003	0.002							10﹣1	0	6	Rec - 6	-0.000255	-0.001786	0.41	0.62	2.69	-0.016	0.001
Blank control	0	7	Rec - 7	-0.00016	-6e-05	0.42	0.54	0.86	-0.002	0.001							Blank control	0	7	Rec - 7	-4.1e-05	-0.000543	0.37	0.71	0.93	-0.002	0.001

## Sheet:  Leaf acetate
male																	female
Standard	StimID	Stim. Description	Recording	Surface[v*s]	Maximum[v]	th1[s]	tm[s]	th2[s]	Slope1[v/s]	Slope2[v/s]							Standard	StimID	Stim. Description	Recording	Surface[v*s]	Maximum[v]	th1[s]	tm[s]	th2[s]	Slope1[v/s]	Slope2[v/s]
Blank control	0	1	Rec - 1	-1.61e-05	-0.00047	0.48	0.59	0.71	-0.001	0.001							Blank control	0	1	Rec - 1	-2.87e-05	-0.000355	0.33	0.62	0.95	-0.001	0.001
10﹣5	0	2	Rec - 2	-2.1e-05	-0.000729	0.55	0.68	0.89	-0.002	0.001							10﹣5	0	2	Rec - 2	-3.9e-05	-0.000798	0.35	0.65	1.09	-0.002	0.001
10﹣4	0	3	Rec - 3	-4.9e-05	-0.000756	0.49	0.61	1.28	-0.002	0.001							10﹣4	0	3	Rec - 3	-0.00031	-0.000845	0.41	0.76	1.27	-0.006	0.001
10﹣3	0	4	Rec - 4	-0.000231	-0.000811	0.41	0.79	1.28	-0.007	0.001							10﹣3	0	4	Rec - 4	-0.000109	-0.00166	0.49	0.89	1.59	-0.009	0.001
10﹣2	0	5	Rec - 5	-3.9e-05	-0.00147	0.58	0.67	1.6	-0.015	0.001							10﹣2	0	5	Rec - 5	-0.000121	-0.001856	0.38	0.78	1.78	-0.015	0.001
10﹣1	0	6	Rec - 6	-0.000419	-0.00219	0.41	0.5	1.68	-0.012	0.001							10﹣1	0	6	Rec - 6	-0.000266	-0.002159	0.44	0.66	2.57	-0.016	0.001
Blank control	0	7	Rec - 7	-1.5e-05	-0.00055	0.46	0.59	0.68	-0.003	0.001							Blank control	0	7	Rec - 7	-3.4e-05	-0.000344	0.35	0.69	0.98	-0.002	0.001
Standard	StimID	Stim. Description	Recording	Surface[v*s]	Maximum[v]	th1[s]	tm[s]	th2[s]	Slope1[v/s]	Slope2[v/s]							Standard	StimID	Stim. Description	Recording	Surface[v*s]	Maximum[v]	th1[s]	tm[s]	th2[s]	Slope1[v/s]	Slope2[v/s]
Blank control	0	1	Rec - 1	-5.1e-05	-0.000502	0.48	0.61	0.76	-0.002	0.001							Blank control	0	1	Rec - 1	-3.5e-05	-0.000364	0.31	0.66	1.26	-0.001	0.001
10﹣5	0	2	Rec - 2	-6.4e-05	-0.000512	0.52	0.74	0.92	-0.003	0.001							10﹣5	0	2	Rec - 2	-3.1e-05	-0.000436	0.32	0.75	1.33	-0.002	0.001
10﹣4	0	3	Rec - 3	-7.9e-05	-0.000629	0.44	0.68	1.52	-0.001	0.002							10﹣4	0	3	Rec - 3	-7.5e-05	-0.000555	0.44	0.67	1.37	-0.006	0.001
10﹣3	0	4	Rec - 4	-9.1e-05	-0.000733	0.39	0.52	1.55	-0.008	0.001							10﹣3	0	4	Rec - 4	-8.2e-05	-0.001029	0.33	0.78	1.51	-0.004	0.001
10﹣2	0	5	Rec - 5	-0.000118	-0.002191	0.45	0.42	1.79	-0.006	0.001							10﹣2	0	5	Rec - 5	-0.000166	-0.001945	0.45	0.83	1.92	-0.016	0.002
10﹣1	0	6	Rec - 6	-0.000151	-0.002156	0.45	0.58	2.01	-0.009	0.002							10﹣1	0	6	Rec - 6	-0.000222	-0.001666	0.39	0.79	2.55	-0.018	0.001
Blank control	0	7	Rec - 7	-4.9e-05	-0.000422	0.5	0.76	0.79	-0.002	0.001							Blank control	0	7	Rec - 7	-3.9e-05	-0.000476	0.33	0.78	1.24	-0.006	0.001
Standard	StimID	Stim. Description	Recording	Surface[v*s]	Maximum[v]	th1[s]	tm[s]	th2[s]	Slope1[v/s]	Slope2[v/s]							Standard	StimID	Stim. Description	Recording	Surface[v*s]	Maximum[v]	th1[s]	tm[s]	th2[s]	Slope1[v/s]	Slope2[v/s]
Blank control	0	1	Rec - 1	-0.000162	-0.000395	0.44	0.61	0.86	-0.001	0.001							Blank control	0	1	Rec - 1	-3.9e-05	-0.000559	0.36	0.68	0.92	-0.002	0.001
10﹣5	0	2	Rec - 2	-0.000191	-0.000568	0.33	0.68	0.87	-0.002	0.001							10﹣5	0	2	Rec - 2	-7.2e-05	-0.000578	0.43	0.71	1.07	-0.001	0.001
10﹣4	0	3	Rec - 3	-0.000141	-0.000513	0.37	0.64	1.35	-0.001	0.001							10﹣4	0	3	Rec - 3	-8.1e-05	-0.000631	0.46	0.85	1.43	-0.003	0.001
10﹣3	0	4	Rec - 4	-0.000244	-0.000678	0.32	0.68	1.35	-0.006	0.001							10﹣3	0	4	Rec - 4	-0.000141	-0.000861	0.38	0.73	1.61	-0.006	0.001
10﹣2	0	5	Rec - 5	-0.000234	-0.001133	0.37	0.58	1.611	-0.008	0.001							10﹣2	0	5	Rec - 5	-0.000179	-0.001591	0.22	0.69	1.73	-0.019	0.001
10﹣1	0	6	Rec - 6	-0.000221	-0.001445	0.33	0.58	1.761	-0.007	0.002							10﹣1	0	6	Rec - 6	-0.000251	-0.001761	0.37	0.71	2.62	-0.012	0.001
Blank control	0	7	Rec - 7	-0.000145	-6.8e-05	0.32	0.58	0.77	-0.002	0.001							Blank control	0	7	Rec - 7	-4.9e-05	-0.00052	0.35	0.79	0.91	-0.006	0.001

## Sheet: Longifolene
male																	female
Standard	StimID	Stim. Description	Recording	Surface[v*s]	Maximum[v]	th1[s]	tm[s]	th2[s]	Slope1[v/s]	Slope2[v/s]							Standard	StimID	Stim. Description	Recording	Surface[v*s]	Maximum[v]	th1[s]	tm[s]	th2[s]	Slope1[v/s]	Slope2[v/s]
Blank control	0	1	Rec - 1	-1.64e-05	-0.000468	0.43	0.54	0.72	-0.001	0.001							Blank control	0	1	Rec - 1	-2.92e-05	-0.000331	0.35	0.66	0.95	-0.001	0.001
10﹣5	0	2	Rec - 2	-2.8e-05	-0.000733	0.48	0.61	0.96	-0.001	0.001							10﹣5	0	2	Rec - 2	-3.7e-05	-0.000771	0.36	0.68	1.18	-0.002	0.001
10﹣4	0	3	Rec - 3	-4.7e-05	-0.000799	0.46	0.61	1.38	-0.005	0.001							10﹣4	0	3	Rec - 3	-0.00031	-0.000839	0.47	0.75	1.85	-0.006	0.001
10﹣3	0	4	Rec - 4	-0.000251	-0.000813	0.44	0.79	1.87	-0.007	0.001							10﹣3	0	4	Rec - 4	-0.000109	-0.00149	0.46	0.74	2.5	-0.009	0.001
10﹣2	0	5	Rec - 5	-2.8e-05	-0.001445	0.55	0.64	2.89	-0.018	0.001							10﹣2	0	5	Rec - 5	-0.000127	-0.001855	0.38	0.79	2.95	-0.015	0.001
10﹣1	0	6	Rec - 6	-0.000444	-0.00223	0.46	0.51	3.1	-0.014	0.001							10﹣1	0	6	Rec - 6	-0.000243	-0.002142	0.32	0.48	3.28	-0.016	0.001
Blank control	0	7	Rec - 7	-2.4e-05	-0.00037	0.44	0.58	0.73	-0.001	0.001							Blank control	0	7	Rec - 7	-2.8e-05	-0.000345	0.37	0.62	0.93	-0.002	0.001
Standard	StimID	Stim. Description	Recording	Surface[v*s]	Maximum[v]	th1[s]	tm[s]	th2[s]	Slope1[v/s]	Slope2[v/s]							Standard	StimID	Stim. Description	Recording	Surface[v*s]	Maximum[v]	th1[s]	tm[s]	th2[s]	Slope1[v/s]	Slope2[v/s]
Blank control	0	1	Rec - 1	-6.6e-05	-0.000522	0.44	0.61	0.82	-0.002	0.001							Blank control	0	1	Rec - 1	-3.6e-05	-0.000368	0.31	0.68	0.89	-0.002	0.001
10﹣5	0	2	Rec - 2	-6.8e-05	-0.000555	0.45	0.78	0.99	-0.001	0.001							10﹣5	0	2	Rec - 2	-4.4e-05	-0.000433	0.32	0.72	1.15	-0.003	0.001
10﹣4	0	3	Rec - 3	-7.9e-05	-0.000634	0.37	0.68	1.59	-0.001	0.002							10﹣4	0	3	Rec - 3	-7.8e-05	-0.000549	0.46	0.73	1.91	-0.004	0.001
10﹣3	0	4	Rec - 4	-7.9e-05	-0.000763	0.35	0.61	2.09	-0.007	0.001							10﹣3	0	4	Rec - 4	-8.2e-05	-0.001028	0.34	0.86	2.51	-0.006	0.001
10﹣2	0	5	Rec - 5	-0.000133	-0.00223	0.41	0.41	3.03	-0.007	0.001							10﹣2	0	5	Rec - 5	-0.000159	-0.001249	0.33	0.73	2.99	-0.012	0.002
10﹣1	0	6	Rec - 6	-0.000148	-0.002152	0.38	0.59	3.34	-0.008	0.002							10﹣1	0	6	Rec - 6	-0.000221	-0.001642	0.39	0.71	3.42	-0.015	0.001
Blank control	0	7	Rec - 7	-6.7e-05	-0.000474	0.45	0.67	0.81	-0.002	0.001							Blank control	0	7	Rec - 7	-3.1e-05	-0.000465	0.34	0.73	0.98	-0.003	0.001
Standard	StimID	Stim. Description	Recording	Surface[v*s]	Maximum[v]	th1[s]	tm[s]	th2[s]	Slope1[v/s]	Slope2[v/s]							Standard	StimID	Stim. Description	Recording	Surface[v*s]	Maximum[v]	th1[s]	tm[s]	th2[s]	Slope1[v/s]	Slope2[v/s]
Blank control	0	1	Rec - 1	-0.000163	-0.00039	0.43	0.62	0.82	-0.001	0.001							Blank control	0	1	Rec - 1	-3.7e-05	-0.000557	0.32	0.78	0.87	-0.002	0.001
10﹣5	0	2	Rec - 2	-0.000188	-0.000565	0.46	0.63	1.04	-0.002	0.001							10﹣5	0	2	Rec - 2	-7.9e-05	-0.000581	0.43	0.72	1.06	-0.001	0.001
10﹣4	0	3	Rec - 3	-0.000146	-0.000565	0.38	0.76	1.48	-0.003	0.001							10﹣4	0	3	Rec - 3	-8.9e-05	-0.000622	0.45	0.81	1.94	-0.003	0.001
10﹣3	0	4	Rec - 4	-0.000262	-0.000649	0.31	0.67	1.94	-0.004	0.001							10﹣3	0	4	Rec - 4	-0.000123	-0.000858	0.31	0.69	2.52	-0.002	0.001
10﹣2	0	5	Rec - 5	-0.000243	-0.001109	0.34	0.64	2.88	-0.006	0.001							10﹣2	0	5	Rec - 5	-0.000181	-0.001581	0.32	0.69	3.01	-0.014	0.001
10﹣1	0	6	Rec - 6	-0.000249	-0.001419	0.35	0.51	3.21	-0.007	0.002							10﹣1	0	6	Rec - 6	-0.000248	-0.001758	0.38	0.62	3.48	-0.013	0.001
Blank control	0	7	Rec - 7	-0.000172	-5.1e-05	0.39	0.59	0.79	-0.002	0.001							Blank control	0	7	Rec - 7	-4.2e-05	-0.000523	0.41	0.76	0.93	-0.001	0.001

## Sheet: butyl butyrate
male																	female
Standard	StimID	Stim. Description	Recording	Surface[v*s]	Maximum[v]	th1[s]	tm[s]	th2[s]	Slope1[v/s]	Slope2[v/s]							Standard	StimID	Stim. Description	Recording	Surface[v*s]	Maximum[v]	th1[s]	tm[s]	th2[s]	Slope1[v/s]	Slope2[v/s]
Blank control	0	1	Rec - 1	-1.65e-05	-0.000469	0.44	0.56	0.75	-0.001	0.001							Blank control	0	1	Rec - 1	-2.76e-05	-0.000345	0.33	0.61	0.95	-0.001	0.001
10﹣5	0	2	Rec - 2	-2.6e-05	-0.000753	0.53	0.67	0.89	-0.003	0.001							10﹣5	0	2	Rec - 2	-3.8e-05	-0.000799	0.35	0.64	1.11	-0.002	0.001
10﹣4	0	3	Rec - 3	-4.8e-05	-0.000789	0.55	0.67	1.36	-0.005	0.001							10﹣4	0	3	Rec - 3	-0.00026	-0.000845	0.46	0.68	1.39	-0.006	0.001
10﹣3	0	4	Rec - 4	-0.000243	-0.000845	0.55	0.75	1.38	-0.007	0.001							10﹣3	0	4	Rec - 4	-0.000122	-0.00176	0.39	0.84	1.64	-0.009	0.001
10﹣2	0	5	Rec - 5	-3.9e-05	-0.001444	0.62	0.65	1.77	-0.011	0.001							10﹣2	0	5	Rec - 5	-0.000167	-0.001867	0.37	0.69	2.08	-0.015	0.001
10﹣1	0	6	Rec - 6	-0.000423	-0.00234	0.65	0.51	2.23	-0.014	0.001							10﹣1	0	6	Rec - 6	-0.000267	-0.002176	0.36	0.55	2.51	-0.016	0.001
Blank control	0	7	Rec - 7	-3.4e-05	-0.00028	0.46	0.54	0.74	-0.003	0.001							Blank control	0	7	Rec - 7	-2.9e-05	-0.000367	0.37	0.62	0.98	-0.002	0.001
Standard	StimID	Stim. Description	Recording	Surface[v*s]	Maximum[v]	th1[s]	tm[s]	th2[s]	Slope1[v/s]	Slope2[v/s]							Standard	StimID	Stim. Description	Recording	Surface[v*s]	Maximum[v]	th1[s]	tm[s]	th2[s]	Slope1[v/s]	Slope2[v/s]
Blank control	0	1	Rec - 1	-5.8e-05	-0.000522	0.46	0.61	0.78	-0.001	0.001							Blank control	0	1	Rec - 1	-3.8e-05	-0.000356	0.37	0.67	1.05	-0.001	0.001
10﹣5	0	2	Rec - 2	-6.5e-05	-0.000549	0.49	0.75	0.94	-0.002	0.001							10﹣5	0	2	Rec - 2	-4.2e-05	-0.000445	0.39	0.73	1.25	-0.002	0.001
10﹣4	0	3	Rec - 3	-7.8e-05	-0.000626	0.33	0.68	1.44	-0.003	0.002							10﹣4	0	3	Rec - 3	-7.8e-05	-0.000542	0.46	0.77	1.46	-0.005	0.001
10﹣3	0	4	Rec - 4	-8.5e-05	-0.000756	0.38	0.59	1.51	-0.006	0.001							10﹣3	0	4	Rec - 4	-8.2e-05	-0.001024	0.35	0.84	1.71	-0.005	0.001
10﹣2	0	5	Rec - 5	-0.000141	-0.00233	0.44	0.52	1.85	-0.008	0.001							10﹣2	0	5	Rec - 5	-0.000146	-0.001248	0.32	0.74	2.08	-0.017	0.002
10﹣1	0	6	Rec - 6	-0.000154	-0.002124	0.33	0.51	2.19	-0.007	0.002							10﹣1	0	6	Rec - 6	-0.000233	-0.001645	0.36	0.72	2.56	-0.012	0.001
Blank control	0	7	Rec - 7	-4.9e-05	-0.000434	0.49	0.63	0.82	-0.001	0.001							Blank control	0	7	Rec - 7	-3.9e-05	-0.000476	0.35	0.64	1.08	-0.002	0.001
Standard	StimID	Stim. Description	Recording	Surface[v*s]	Maximum[v]	th1[s]	tm[s]	th2[s]	Slope1[v/s]	Slope2[v/s]							Standard	StimID	Stim. Description	Recording	Surface[v*s]	Maximum[v]	th1[s]	tm[s]	th2[s]	Slope1[v/s]	Slope2[v/s]
Blank control	0	1	Rec - 1	-0.000161	-0.000389	0.46	0.61	0.81	-0.001	0.001							Blank control	0	1	Rec - 1	-3.8e-05	-0.000566	0.36	0.74	0.88	-0.002	0.001
10﹣5	0	2	Rec - 2	-0.000189	-0.000552	0.49	0.62	0.96	-0.002	0.001							10﹣5	0	2	Rec - 2	-7.9e-05	-0.000576	0.44	0.78	1.16	-0.001	0.001
10﹣4	0	3	Rec - 3	-0.000141	-0.000558	0.36	0.74	1.35	-0.003	0.001							10﹣4	0	3	Rec - 3	-7.2e-05	-0.000612	0.46	0.78	1.53	-0.003	0.001
10﹣3	0	4	Rec - 4	-0.000262	-0.000649	0.36	0.75	1.37	-0.006	0.001							10﹣3	0	4	Rec - 4	-0.000126	-0.000868	0.38	0.65	1.79	-0.007	0.001
10﹣2	0	5	Rec - 5	-0.000242	-0.001131	0.39	0.66	1.73	-0.006	0.001							10﹣2	0	5	Rec - 5	-0.000178	-0.001576	0.32	0.68	2.16	-0.014	0.001
10﹣1	0	6	Rec - 6	-0.000249	-0.001439	0.42	0.53	2.23	-0.007	0.002							10﹣1	0	6	Rec - 6	-0.000249	-0.001759	0.44	0.62	2.72	-0.014	0.001
Blank control	0	7	Rec - 7	-0.000142	-6.7e-05	0.46	0.58	0.79	-0.002	0.001							Blank control	0	7	Rec - 7	-5.3e-05	-0.000532	0.32	0.71	0.93	-0.001	0.001
